# Supplementary material for: Hexanuclear {ZnII4FeIII2} and {ZnII4CrIII2} complexes from the use of potentially tetradentate NOO′O′′ Schiff-base ligands
Source: Royal Society of Chemistry journal article supplement (doi:10.1039/d4nj02030h), 2024-01-01
Supplement: d4nj02030h1.pdf [file d4nj02030h1.pdf]

## ELECTRONIC SUPPLEMENTARY INFORMATION (ESI)

to

### Hexanuclear $\{\text{Zn}^{\text{II}}_4\text{Fe}^{\text{III}}_2\}$ and $\{\text{Zn}^{\text{II}}_4\text{Cr}^{\text{III}}_2\}$ complexes from the use of potentially tetradentate NOO'O'' Schiff-base Ligands <sup>†</sup>

Konstantinos N. Pantelis <sup>a</sup>, Sotiris G. Skiadas <sup>a</sup>, Zoi G. Lada <sup>b</sup>, Rodolphe Clérac <sup>c</sup>, Yiannis Sanakis <sup>\*d</sup>,  
Pierre Dechambenoit <sup>\*c</sup>, and Spyros P. Perlepes <sup>\*a,b</sup>

<sup>a</sup> Department of Chemistry, University of Patras, Patras 26504, Greece, E-mail: [perlepes@upatras.gr](mailto:perlepes@upatras.gr)

<sup>b</sup> Institute of Chemical Engineering Sciences (ICE-HT), Foundation for Research and Technology-Hellas (FORTH), Platani, P.O. Box 144, Patras 26504, Greece

<sup>c</sup> Univ. Bordeaux, CNRS, CRPP, UMR 5031, F-33600 Pessac, France, E-mail: [pierre.dechambenoit@u-bordeaux.fr](mailto:pierre.dechambenoit@u-bordeaux.fr)

<sup>d</sup> Institute of Nanoscience and Nanotechnology, NCSR "Demokritos", Aghia Paraskevi Attikis 15310, Greece, Email: [i.sanakis@inn.demokritos.gr](mailto:i.sanakis@inn.demokritos.gr)

<sup>†</sup>Dedicated to Professor Mark Turnbull on the occasion of his retirement; a great inorganic chemist and magnetochemist, a precious friend.

**Table S1** Crystallographic data for complexes  $[\text{Zn}_4\text{Fe}_2(\text{saphCOO})_6(\text{NO}_3)_2(\text{EtOH})_2]\cdot 4\text{CH}_2\text{Cl}_2\cdot 2\text{EtOH}$  (**1**·4CH<sub>2</sub>Cl<sub>2</sub>·2EtOH),  $[\text{Zn}_4\text{Cr}_2(\text{saphCOO})_6(\text{NO}_3)_2(\text{H}_2\text{O})_2]\cdot 4\text{MeCN}\cdot 2\text{EtOH}$  (**2**·4MeCN·2EtOH) and  $[\text{Zn}_4\text{Fe}_2(4\text{ClisaphCOO})_6(\text{NO}_3)_2(\text{EtOH})_2]\cdot 4\text{CH}_2\text{Cl}_2\cdot 2\text{EtOH}$  (**3**·4CH<sub>2</sub>Cl<sub>2</sub>·2EtOH)

| Compound                                        | 1·4CH <sub>2</sub> Cl <sub>2</sub> ·2EtOH                                                                                                                                  | 3·4CH <sub>2</sub> Cl <sub>2</sub> ·2EtOH                                                                                                                                                  | 2·4MeCN·2EtOH                                                                                                                                                             |
|-------------------------------------------------|----------------------------------------------------------------------------------------------------------------------------------------------------------------------------|--------------------------------------------------------------------------------------------------------------------------------------------------------------------------------------------|---------------------------------------------------------------------------------------------------------------------------------------------------------------------------|
| <b>Formula</b>                                  | C <sub>88</sub> H <sub>66</sub> Fe <sub>2</sub> N <sub>8</sub> O <sub>26</sub> Zn <sub>4</sub> ·<br>4(CH <sub>2</sub> Cl <sub>2</sub> )·2(C <sub>2</sub> H <sub>6</sub> O) | C <sub>88</sub> H <sub>60</sub> Cl <sub>6</sub> Fe <sub>2</sub> N <sub>8</sub> O <sub>26</sub> Zn <sub>4</sub> ·<br>4(CH <sub>2</sub> Cl <sub>2</sub> )·2(C <sub>2</sub> H <sub>6</sub> O) | C <sub>84</sub> H <sub>58</sub> Cr <sub>2</sub> N <sub>8</sub> O <sub>26</sub> Zn <sub>4</sub> ·<br>2(C <sub>2</sub> H <sub>6</sub> O)·4(C <sub>2</sub> H <sub>3</sub> N) |
| <b>FW (g·mol<sup>-1</sup>)</b>                  | 2456.50                                                                                                                                                                    | 2663.16                                                                                                                                                                                    | 2217.21                                                                                                                                                                   |
| <b>Crystal color</b>                            | brown                                                                                                                                                                      | brown                                                                                                                                                                                      | red                                                                                                                                                                       |
| <b>Crystal size (mm)</b>                        | 0.24 x 0.17 x 0.10                                                                                                                                                         | 0.09 x 0.07 x 0.02                                                                                                                                                                         | 0.11 x 0.05 x 0.03                                                                                                                                                        |
| <b>Crystal system</b>                           | monoclinic                                                                                                                                                                 | triclinic                                                                                                                                                                                  | triclinic                                                                                                                                                                 |
| <b>Space group</b>                              | P2 <sub>1</sub> /c                                                                                                                                                         | P-1                                                                                                                                                                                        | P-1                                                                                                                                                                       |
| <b>Temperature</b>                              | 120 K                                                                                                                                                                      | 120 K                                                                                                                                                                                      | 120 K                                                                                                                                                                     |
| <b>a (Å)</b>                                    | 12.175(3)                                                                                                                                                                  | 12.2993(11)                                                                                                                                                                                | 12.3043(5)                                                                                                                                                                |
| <b>b (Å)</b>                                    | 27.856(7)                                                                                                                                                                  | 15.6707(13)                                                                                                                                                                                | 14.2093(6)                                                                                                                                                                |
| <b>c (Å)</b>                                    | 16.416(3)                                                                                                                                                                  | 15.6934(13)                                                                                                                                                                                | 15.7458(7)                                                                                                                                                                |
| <b>α (°)</b>                                    | 90                                                                                                                                                                         | 67.497(3)                                                                                                                                                                                  | 109.169(2)                                                                                                                                                                |
| <b>β (°)</b>                                    | 113.189(15)                                                                                                                                                                | 72.688(3)                                                                                                                                                                                  | 90.594(2)                                                                                                                                                                 |
| <b>γ (°)</b>                                    | 90                                                                                                                                                                         | 83.591(3)                                                                                                                                                                                  | 113.395(2)                                                                                                                                                                |
| <b>V (Å<sup>3</sup>)</b>                        | 5118(2)                                                                                                                                                                    | 2667.8(4)                                                                                                                                                                                  | 2354.85(18)                                                                                                                                                               |
| <b>Z</b>                                        | 2                                                                                                                                                                          | 1                                                                                                                                                                                          | 1                                                                                                                                                                         |
| <b>d<sub>calc</sub></b>                         | 1.594                                                                                                                                                                      | 1.658                                                                                                                                                                                      | 1.563                                                                                                                                                                     |
| <b>μ (mm<sup>-1</sup>)</b>                      | 1.488                                                                                                                                                                      | 1.579                                                                                                                                                                                      | 1.312                                                                                                                                                                     |
| <b>θ<sub>min</sub> - θ<sub>max</sub></b>        | 1.462° - 23.565°                                                                                                                                                           | 1.734° - 21.529°                                                                                                                                                                           | 1.828° - 25.091°                                                                                                                                                          |
| <b>Refl. coll. / unique</b>                     | 61656 / 7381                                                                                                                                                               | 55061 / 6132                                                                                                                                                                               | 87772 / 8353                                                                                                                                                              |
| <b>Completeness to 2θ</b>                       | 0.967                                                                                                                                                                      | 0.996                                                                                                                                                                                      | 0.997                                                                                                                                                                     |
| <b>R<sub>int</sub></b>                          | 0.1004                                                                                                                                                                     | 0.0938                                                                                                                                                                                     | 0.1684                                                                                                                                                                    |
| <b>Refined param./restr.</b>                    | 660 / 12                                                                                                                                                                   | 681 / 18                                                                                                                                                                                   | 650 / 2                                                                                                                                                                   |
| <b><sup>a</sup>R<sub>1</sub> (I &gt; 2σ(I))</b> | 0.0791                                                                                                                                                                     | 0.0423                                                                                                                                                                                     | 0.0326                                                                                                                                                                    |
| <b><sup>b</sup>wR<sub>2</sub> (all data)</b>    | 0.2076                                                                                                                                                                     | 0.1099                                                                                                                                                                                     | 0.0866                                                                                                                                                                    |
| <b>Goodness of fit</b>                          | 1.181                                                                                                                                                                      | 1.056                                                                                                                                                                                      | 1.009                                                                                                                                                                     |
| <b>CCDC number</b>                              | 2316071                                                                                                                                                                    | 2316072                                                                                                                                                                                    | 2316073                                                                                                                                                                   |

$$^a R_1 = \frac{\sum(|F_o| - |F_c|)}{\sum(|F_o|)}$$

$$^b wR_2 = \left\{ \frac{\sum[w(F_o^2 - F_c^2)^2]}{\sum[w(F_o^2)^2]} \right\}^{1/2}$$

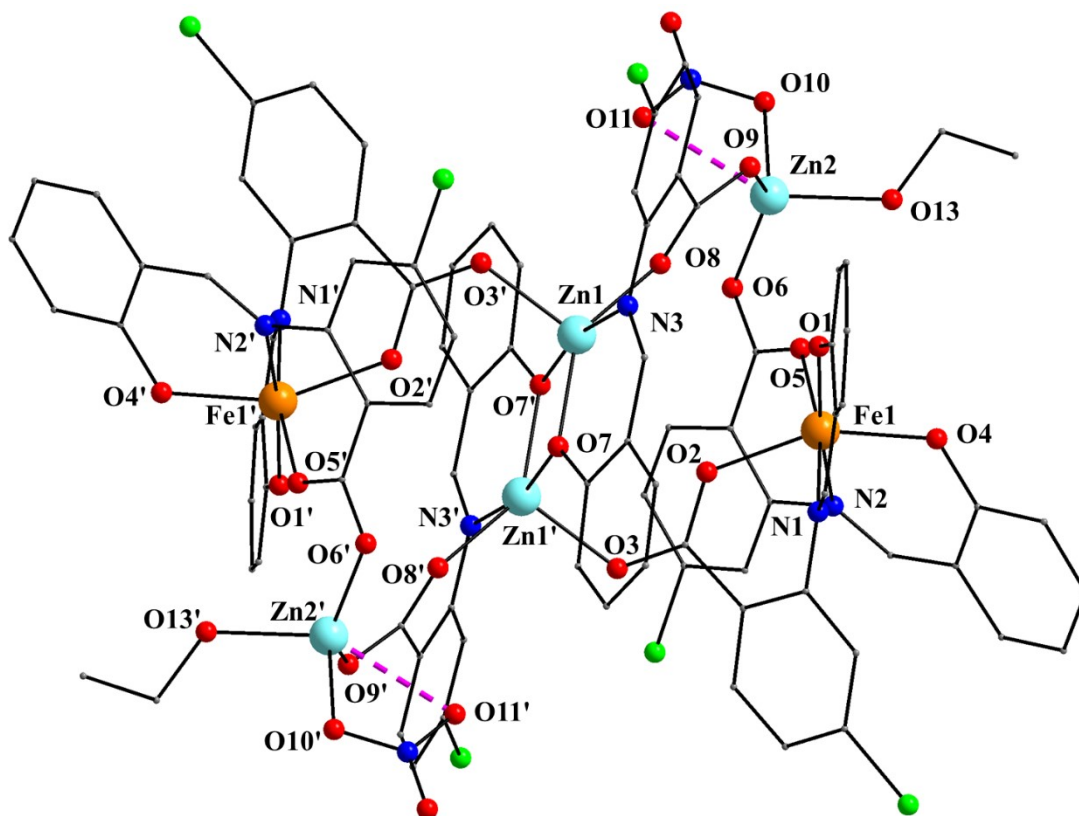

**Fig. S1** Partially labeled plot of the molecule  $[Zn_4Fe_2(4ClisaphCOO)_6(NO_3)_2(EtOH)_2]$  that is present in the crystal structure of  $3 \cdot 4CH_2Cl_2 \cdot 2EtOH$ . The dashed lines indicate a weakly bonding interaction, i.e. semicoordination. Symmetry operation used to generate equivalent atoms: (')  $-x + 1, -y + 1, -z + 2$ .

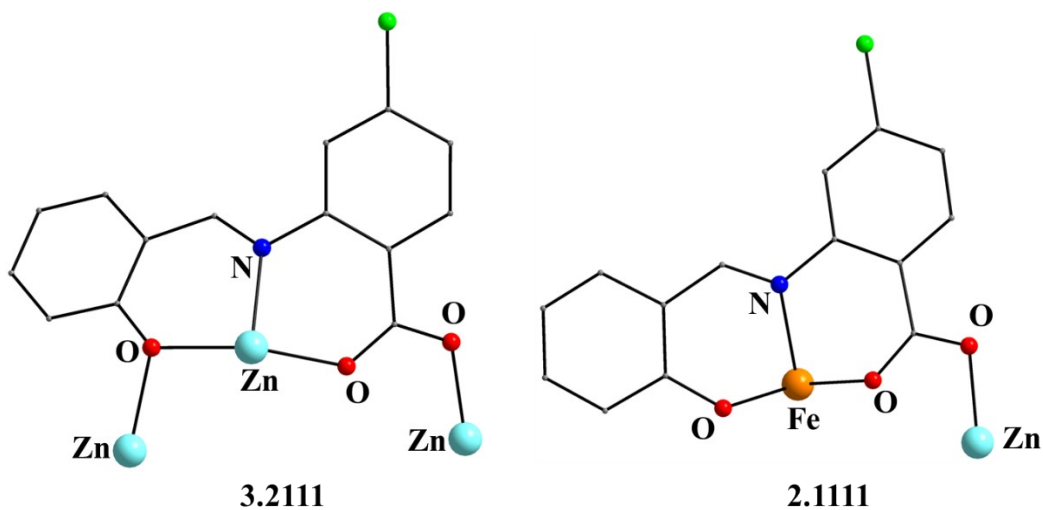

**Fig. S2** The coordination modes (using Harris notation) of the  $4ClisaphCOO^{2-}$  ligands in complex  $3 \cdot 4CH_2Cl_2 \cdot 2EtOH$ ; four ligands adopt the 2.1111 ligation mode and two the 3.2111 one.

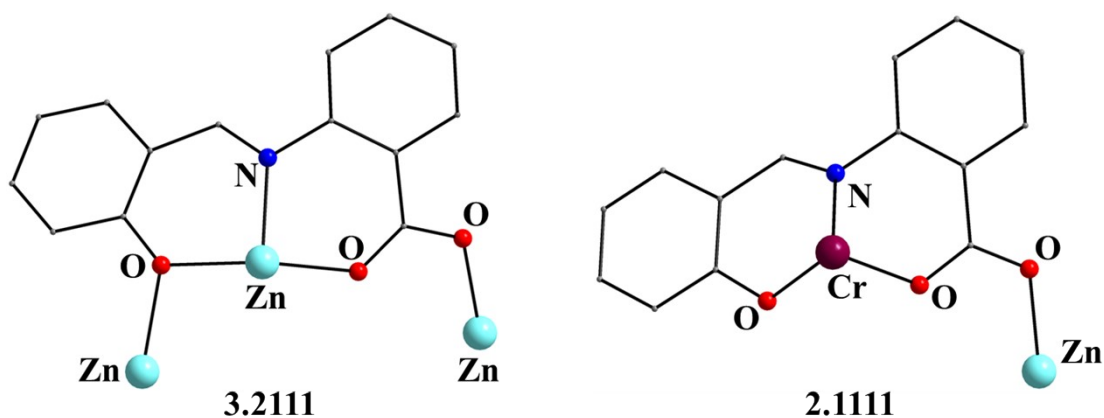

**Fig. S3** The coordination modes (using Harris notation) of the  $\text{saphCOO}^{2-}$  ligands in complex  $\mathbf{2}\cdot\mathbf{4MeCN}\cdot\mathbf{2EtOH}$ ; four ligands adopt the 2.1111 ligation mode and two the 3.2111 one.

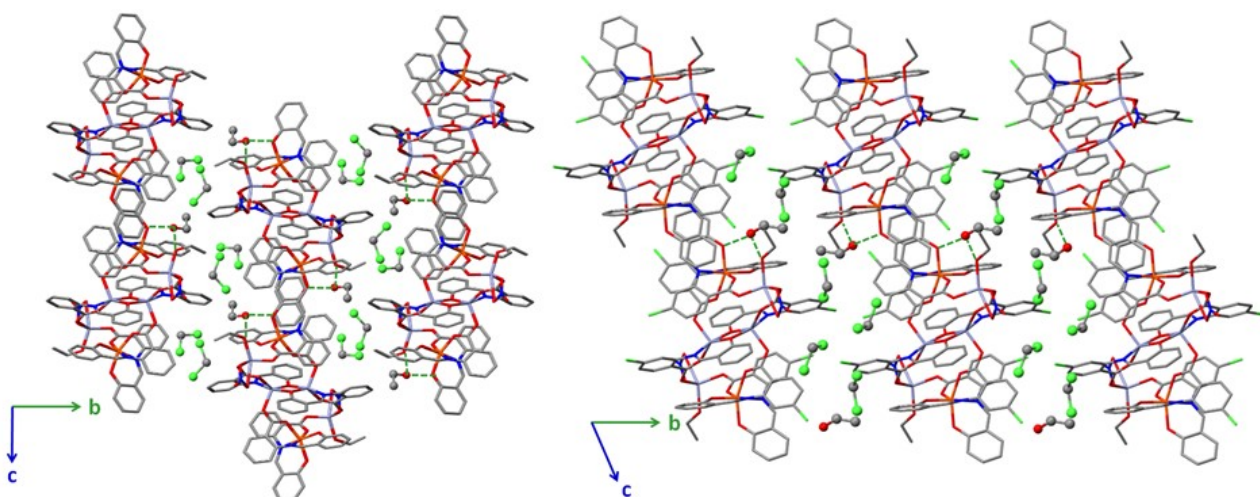

**Fig. S4** Stick representations of  $\mathbf{1}\cdot\mathbf{4CH}_2\mathbf{Cl}_2\cdot\mathbf{2EtOH}$  (left) and  $\mathbf{3}\cdot\mathbf{4CH}_2\mathbf{Cl}_2\cdot\mathbf{2EtOH}$  (right) in the (bc) plane, showing the packing of the complexes separated by lattice  $\text{CH}_2\text{Cl}_2$  molecules (depicted in ball and stick representation). H atoms are omitted for clarity. Intermolecular H bonds are illustrated with dashed green lines. C, grey; H, white; N, blue; O, red; Cl, light green; Fe, orange; Zn, light blue.

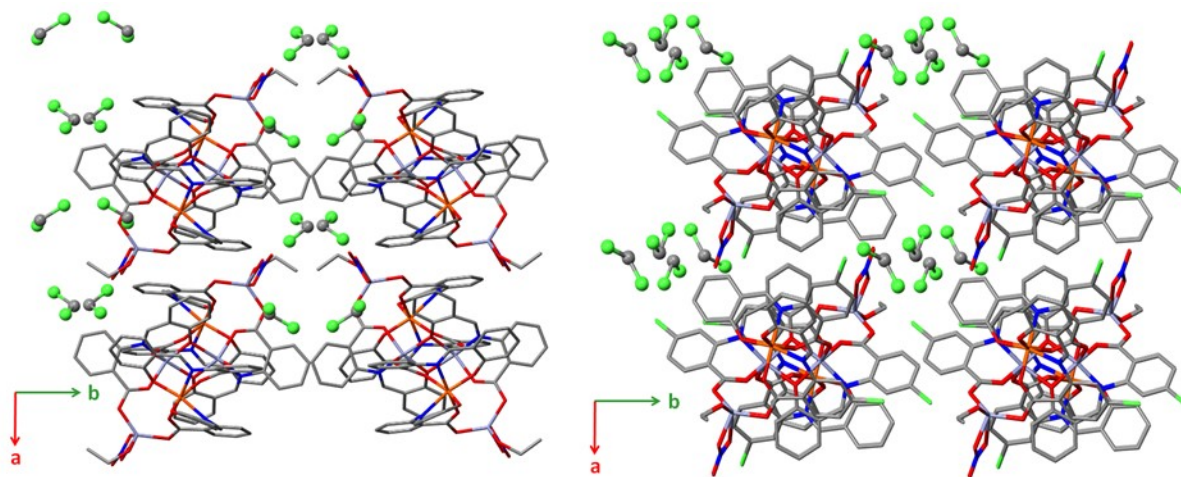

**Fig. S5** Stick representations of **1**·4CH<sub>2</sub>Cl<sub>2</sub>·2EtOH (left) and **3**·4CH<sub>2</sub>Cl<sub>2</sub>·2EtOH (right) in the (ab) plane, showing the packing of the complexes separated by lattice CH<sub>2</sub>Cl<sub>2</sub> molecules (depicted in ball and stick representation). H atoms and lattice EtOH molecules are omitted for clarity. Intermolecular H bonds are illustrated with dashed green lines. C, grey; H, white; N, blue; O, red; Cl, light green; Fe, orange; Zn, light blue.

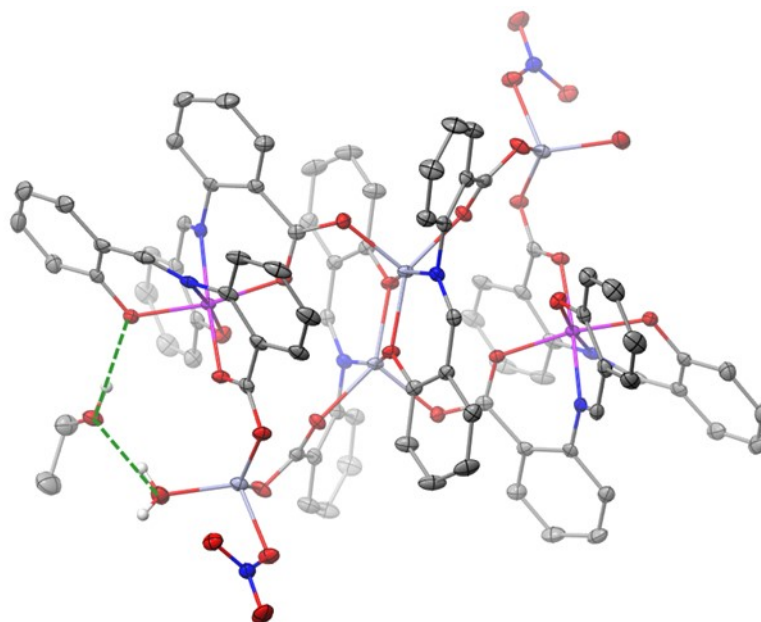

**Fig. S6** ORTEP-type view of complex **2**·4MeCN·2EtOH and the H-bonded EtOH molecules in the crystal at 120 K. Thermal ellipsoids are depicted at a 50% probability level. Lattice MeCN molecules and H atoms are omitted for clarity, except those involved in H-bonding. H bonds are depicted in dashed green lines. C, grey; H, white; N, blue; O, red; Cr, purple; Zn, light blue.

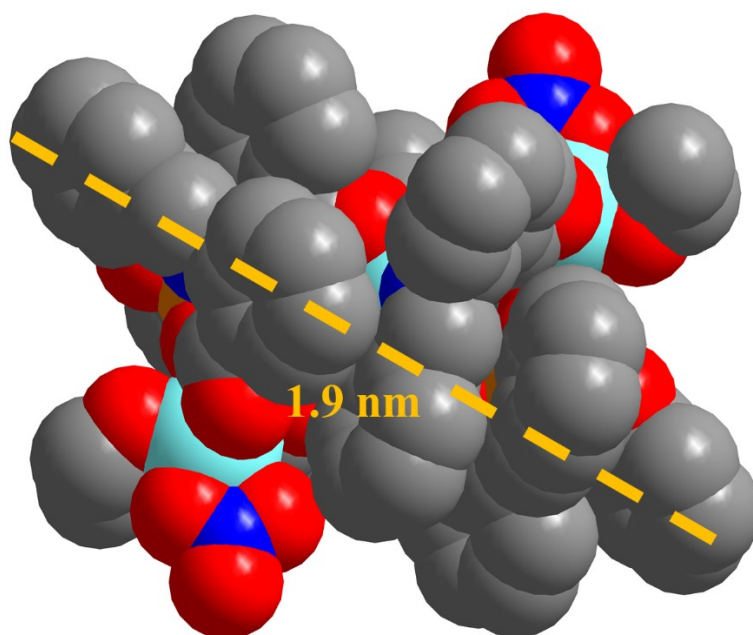

**Fig. S7** Space-filling diagram of **1**.

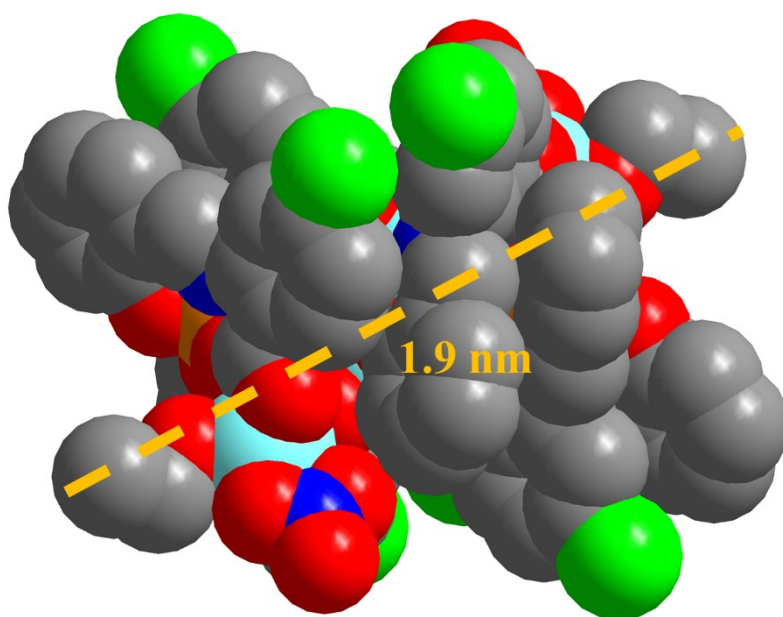

**Fig. S8** Space-filling diagram of **3**.

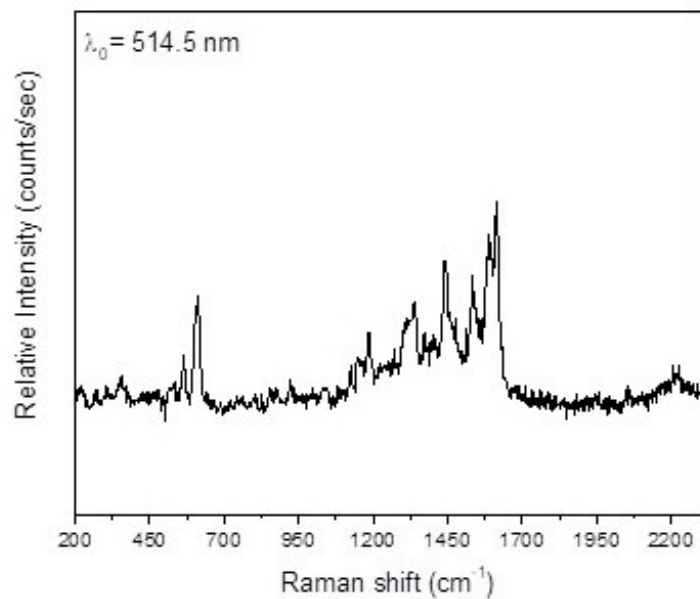

**Fig. S9** The Raman spectrum of a dried sample of **1** in the 2300-200 cm<sup>-1</sup> region.

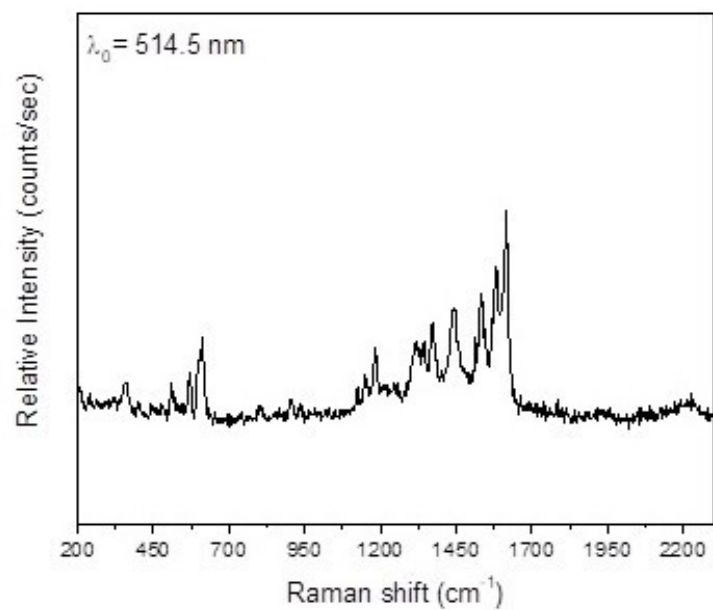

**Fig. S10** The Raman spectrum of a dried sample of **3** in the 2300-200 cm<sup>-1</sup> region.



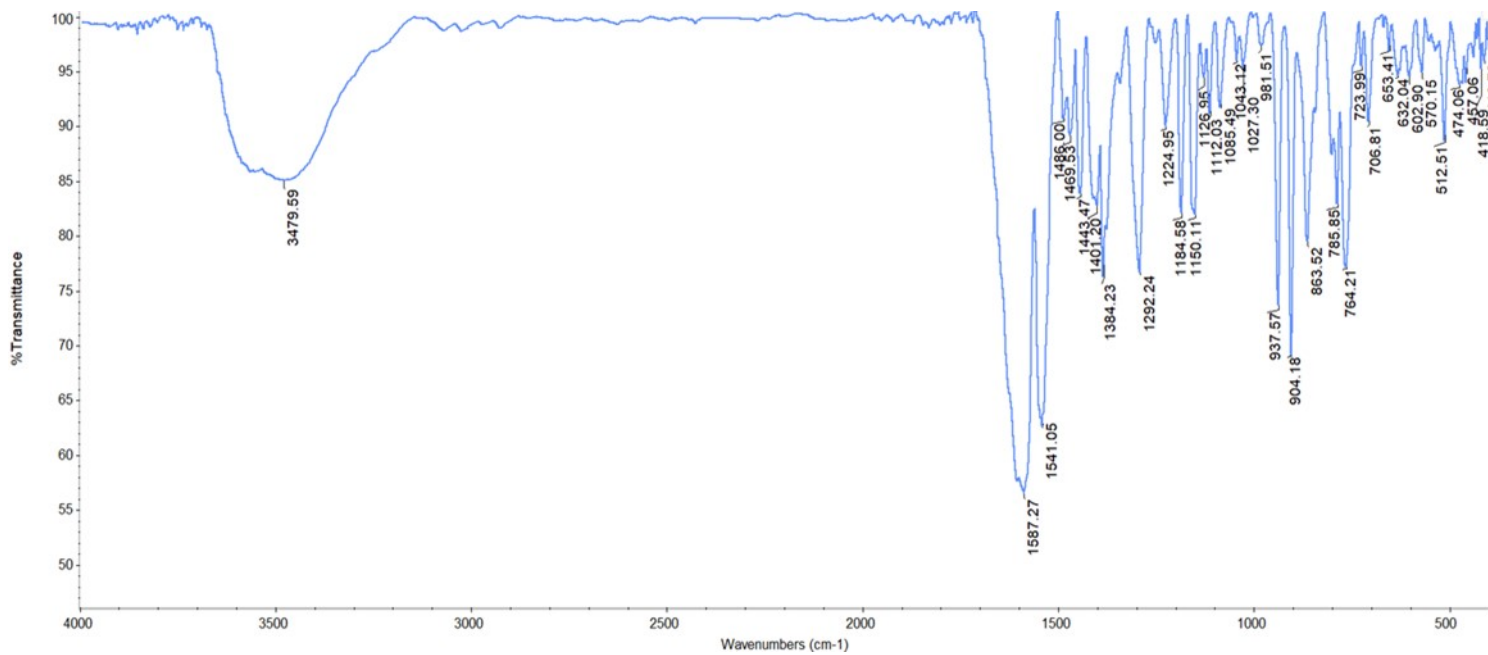

**Fig. S11** The IR spectrum (KBr,  $\text{cm}^{-1}$ ) of a dried sample of **3**.

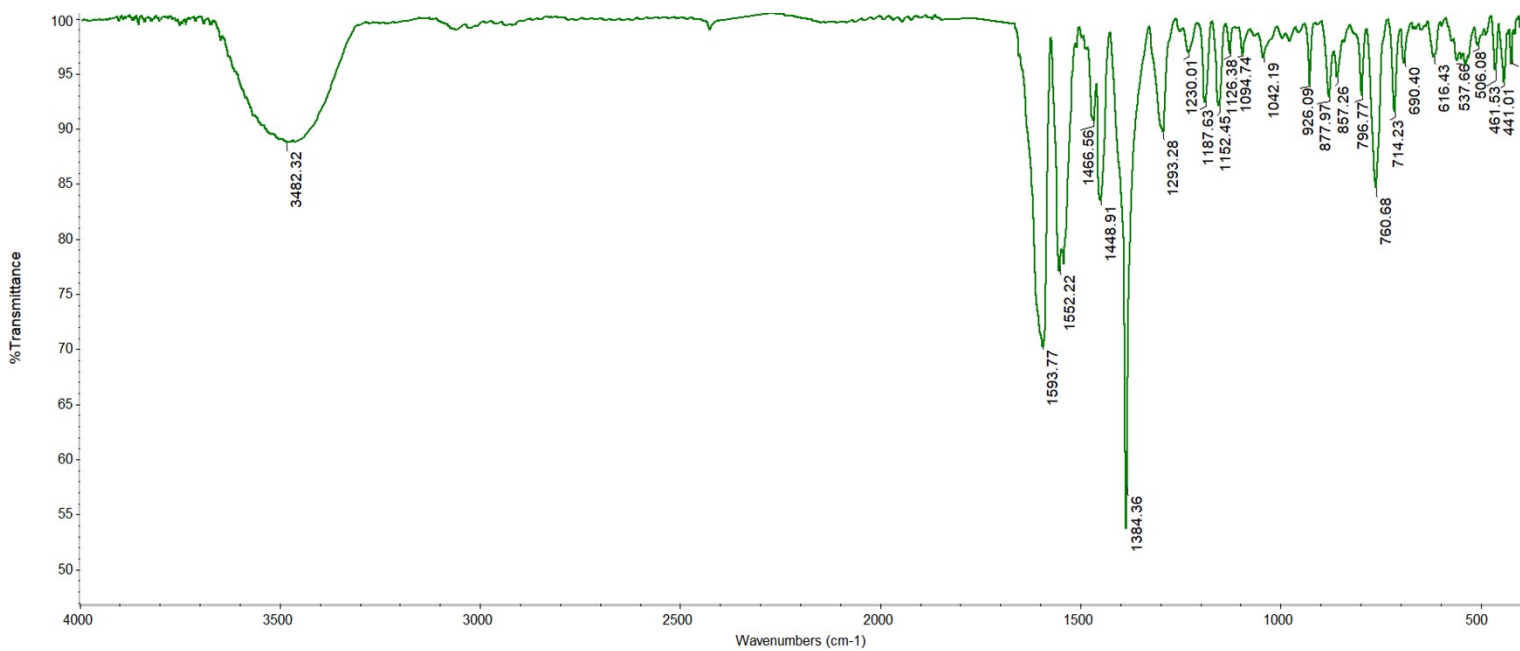

**Fig. S12** The IR spectrum (KBr,  $\text{cm}^{-1}$ ) of a dried sample of **2**.



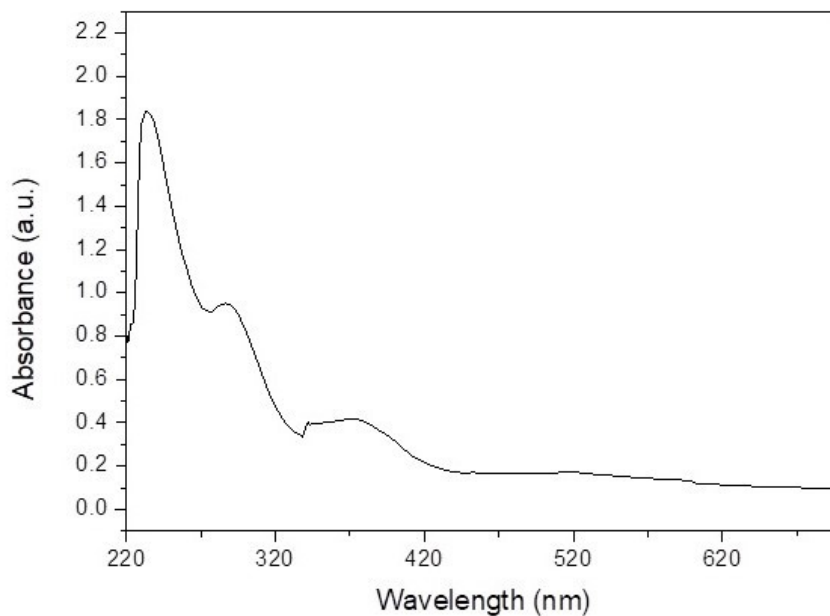

**Fig. S13** The UV/Vis spectrum of a dried sample of **3** in  $\text{CH}_2\text{Cl}_2$ . The 340 nm peak is a ghost peak due to the instrument used.

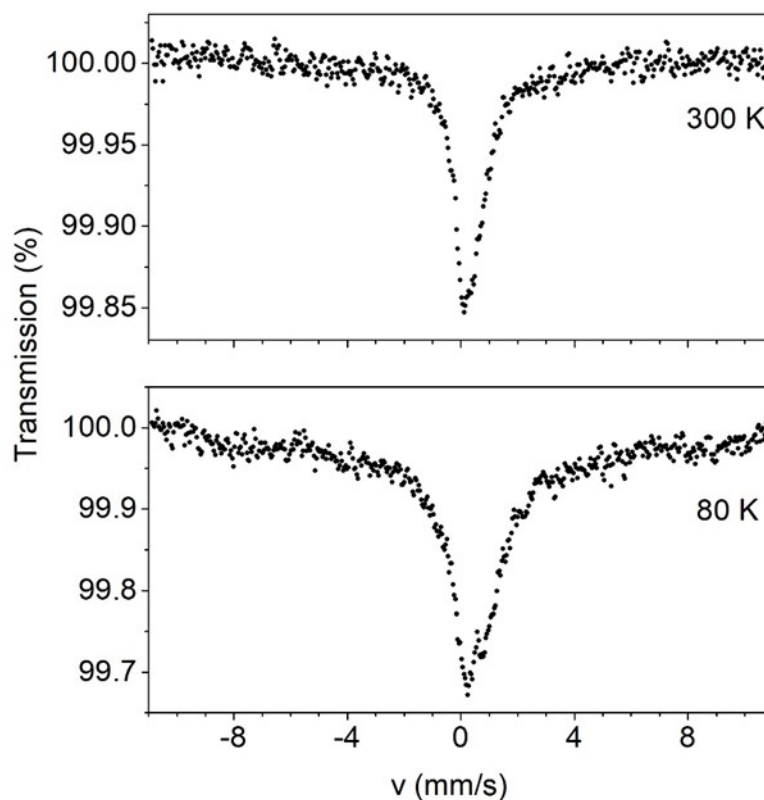

**Fig. S14** Mössbauer spectra of powdered samples of complex **1** recorded at 300 and 80 K in zero applied field.

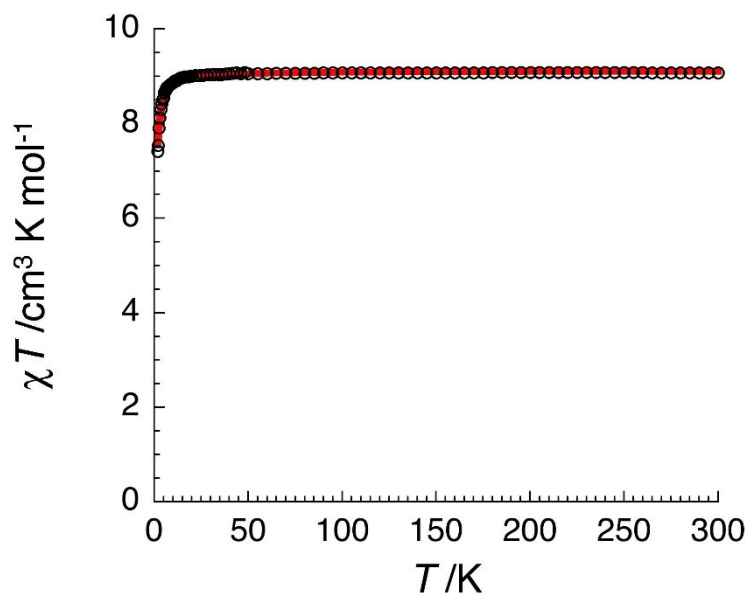

**Fig. S15** Temperature dependence of the  $\chi T$  product (where  $\chi$  is the molar magnetic susceptibility that equals  $M/H$  per complex, and  $T$  the temperature) collected in an applied dc magnetic field ( $H$ ) of 0.1 T for  $3 \cdot 4\text{CH}_2\text{Cl}_2 \cdot 2\text{EtOH}$ . The solid red line is the best fit of the experimental data to an Heisenberg  $S_{\text{Fe}} = 5/2$  spin dimer model as discussed in the text (with  $\mathbf{H} = -2J(S_{\text{Fe}1} \bullet S_{\text{Fe}2})$ :  $J/k_B = -0.06(1)$  K and  $g = 2.04(5)$ ).

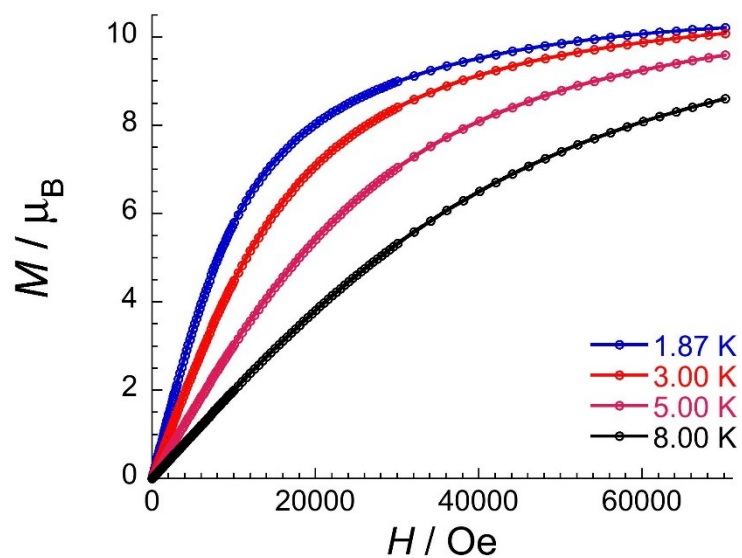

**Fig. S16** Field dependence of the magnetization ( $M$ ) for  $3 \cdot 4\text{CH}_2\text{Cl}_2 \cdot 2\text{EtOH}$  below 8 K ( $M(1.87 \text{ K}, 7 \text{ T}) = 10.2 \mu_B$  implying  $g = 2.04$ ).

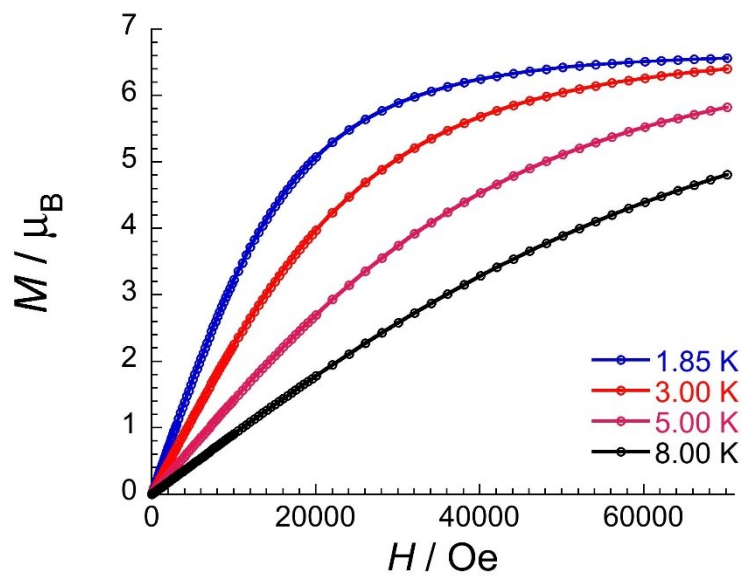

**Fig. S17** Field dependence of the magnetization ( $M$ ) for  $2 \cdot 4\text{MeCN} \cdot 2\text{EtOH}$  below 8 K ( $M(1.85 \text{ K}, 7 \text{ T}) = 6.6 \mu_B$  implying  $g = 2.20$ ).

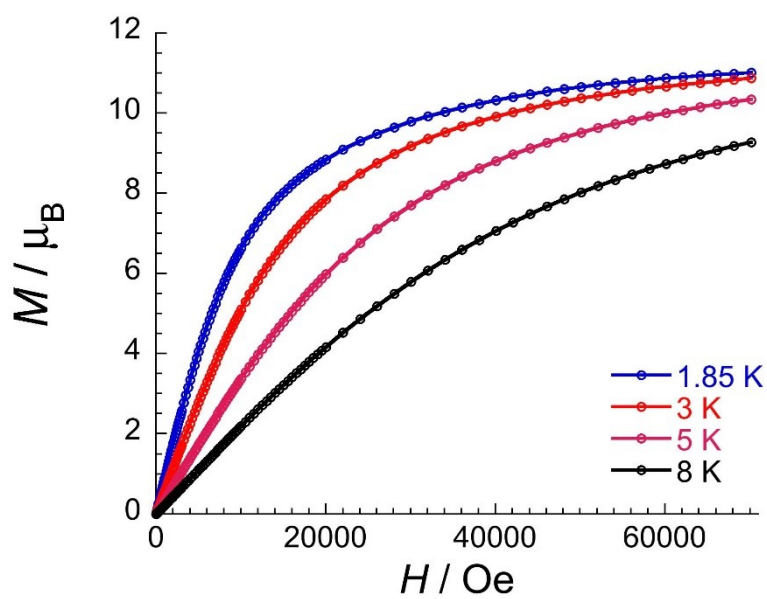

**Figure S18** Field dependence of the magnetization ( $M$ ) for  $1 \cdot 4\text{CH}_2\text{Cl}_2 \cdot 2\text{EtOH}$  below 8 K ( $M(1.85 \text{ K}, 7 \text{ T}) = 11.0 \mu_B$  implying  $g = 2.10$ ).
